# Supplementary material for: The Depression Anxiety Stress Scale 8-Items Expresses Robust Psychometric Properties as an Ideal Shorter Version of the Depression Anxiety Stress Scale 21 Among Healthy Respondents From Three Continents
Source: Front Psychol. 2022 Mar 24;13:799769. doi: 10.3389/fpsyg.2022.799769 (PMC9044488; doi:10.3389/fpsyg.2022.799769)
Supplement: Supplementary file 3 [file Table_3.XLSX]

## Sheet: Normality, outliers, collineari
DASS 8														DASS 12
Coefficientsa														Coefficientsa
Model		Unstandardized Coefficients		Standardized Coefficients	t	Sig.	95.0% Confidence Interval for B		Collinearity Statistics					Model		Unstandardized Coefficients		Standardized Coefficients	t	Sig.	95.0% Confidence Interval for B		Collinearity Statistics
		B	Std. Error	Beta			Lower Bound	Upper Bound	Tolerance	VIF						B	Std. Error	Beta			Lower Bound	Upper Bound	Tolerance	VIF
1	(Constant)	9.16075e-15	3.26028e-08		2.80981e-07	1	-6.3955e-08	6.3955e-08						1	(Constant)	1.28348e-15	2.85121e-08		4.50152e-08	1	-5.59307e-08	5.59307e-08
	I felt that I was using a lot of nervous energy	1	2.88944e-08	0.162664	3.46088e+07	0	1	1	0.53679	1.86293					I couldn't seem to experience any positive feeling at all	1	2.2048e-08	0.129633	4.53556e+07	0	1	1	0.586259	1.70573
	I was worried about situations in which I might panic and make a fool of myself	1	2.51916e-08	0.181899	3.96957e+07	0	1	1	0.564728	1.77076					I felt that I had nothing to look forward to	1	2.27382e-08	0.137312	4.39788e+07	0	1	1	0.491276	2.03551
	I felt that I had nothing to look forward to	1	2.779e-08	0.173058	3.59842e+07	0	1	1	0.512683	1.95052					I felt down-hearted and blue	1	2.44139e-08	0.136259	4.09602e+07	0	1	1	0.432767	2.31071
	I found it difficult to relax	1	2.64918e-08	0.169212	3.77475e+07	0	1	1	0.590096	1.69464					I felt I wasn't worth much as a person	1	2.14076e-08	0.150191	4.67124e+07	0	1	1	0.463272	2.15856
	I felt down-hearted and blue	1	2.87658e-08	0.171731	3.47635e+07	0	1	1	0.48592	2.05795					I was aware of dryness of my mouth	1	1.96722e-08	0.127861	5.08331e+07	0	1	1	0.756967	1.32106
	I felt I was close to panic	1	3.13895e-08	0.156275	3.18577e+07	0	1	1	0.49279	2.02926					I experienced breathing difficulty (eg excessively rapid breathing, breathlessness in the absence of physical exertion)	1	2.51707e-08	0.10737	3.97287e+07	0	1	1	0.655696	1.5251
	I was unable to become enthusiastic about anything	1	2.774e-08	0.163848	3.6049e+07	0	1	1	0.574006	1.74214					I experienced trembling (eg in the hands)	1	2.21596e-08	0.113977	4.51271e+07	0	1	1	0.750761	1.33198
	I felt scared without any good reason	1	2.81914e-08	0.161944	3.54718e+07	0	1	1	0.568912	1.75774					I was aware of the action of my heart in the absence of physical exertion (eg sense of heart rate increase, heart missing a beat)	1	2.28431e-08	0.119142	4.37769e+07	0	1	1	0.646572	1.54662
a. Dependent Variable: DASS8Total															I found it hard to wind down	1	1.737e-08	0.132754	5.75705e+07	0	1	1	0.900665	1.11029
															I found myself getting agitated	1	2.3566e-08	0.127199	4.24341e+07	0	1	1	0.53299	1.87621
Assessment of normality (Group number 1)															I found it difficult to relax	1	2.1177e-08	0.134261	4.7221e+07	0	1	1	0.592421	1.68799
															I felt that I was rather touchy	1	2.23225e-08	0.121414	4.47979e+07	0	1	1	0.651986	1.53377
Variable	min	max	skew	c.r.	kurtosis	c.r.								a. Dependent Variable: KI_DASS12
DASS12	0	3	0.669	10.304	-0.59	-4.543
DASS8	0	3	0.738	11.367	-0.505	-3.886								Assessment of normality (Group number 1)
DASS20	0	3	0.94	14.482	-0.186	-1.431
DASS15	0	3	0.988	15.221	0.069	0.529								Variable	min	max	skew	c.r.	kurtosis	c.r.
DASS9	0	3	0.541	8.339	-0.965	-7.435								DASS18	0	3	0.771	11.872	-0.288	-2.216
DASS16	0	3	0.684	10.535	-0.551	-4.246								DASS12	0	3	0.669	10.304	-0.59	-4.543
DASS13	0	3	0.59	9.084	-0.733	-5.648								DASS11	0	3	0.6	9.247	-0.499	-3.843
DASS10	0	3	0.753	11.6	-0.597	-4.599								DASS1	0	3	0.738	11.368	-0.505	-3.893
Multivariate					22.716	33.884								DASS19	0	3	1.02	15.718	0.168	1.296
														DASS7	0	3	1.359	20.938	1.018	7.84
Observations farthest from the centroid (Mahalanobis distance) (Group number 1)														DASS4	0	3	1.51	23.256	1.465	11.287
														DASS2	0	3	1.081	16.658	0.114	0.875
Observation number	Mahalanobis d-squared	p1	p2											DASS17	0	3	0.574	8.842	-1.041	-8.022
1123	44.329	0	0.001											DASS13	0	3	0.59	9.084	-0.733	-5.648
1124	42.699	0	0											DASS10	0	3	0.753	11.6	-0.597	-4.599
161	39.972	0	0											DASS3	0	3	1.025	15.793	-0.02	-0.154
1117	37.32	0	0											Multivariate					46.332	47.691
1118	37.32	0	0
975	36.115	0	0											Observations farthest from the centroid (Mahalanobis distance) (Group number 1)
886	36.004	0	0
863	35.397	0	0											Observation number	Mahalanobis d-squared	p1	p2
124	34.591	0	0											124	59.167	0	0
152	33.766	0	0											413	48.143	0	0
861	33.457	0	0											166	46.631	0	0
1109	33.015	0	0											151	45.69	0	0
175	30.23	0	0											466	42.225	0	0
29	30.024	0	0											1117	42.012	0	0
58	29.128	0	0											1118	42.012	0	0
474	29.108	0	0											44	41.523	0	0
174	28.645	0	0											417	41.346	0	0
760	28.4	0	0											975	40.286	0	0
1379	28.1	0	0											134	39.425	0	0
456	27.345	0.001	0											202	39.11	0	0
12	27.208	0.001	0											243	39.07	0	0
896	26.962	0.001	0											718	39.003	0	0
165	26.849	0.001	0											236	38.552	0	0
862	26.511	0.001	0											861	37.836	0	0
128	26.126	0.001	0											35	37.629	0	0
1381	26.096	0.001	0											123	37.614	0	0
13	26.061	0.001	0											902	36.024	0	0
141	25.336	0.001	0											11	35.671	0	0
166	24.695	0.002	0											235	35.52	0	0
832	24.568	0.002	0											1123	35.246	0	0
202	24.543	0.002	0											760	35.24	0	0
864	24.454	0.002	0											2	35.094	0	0
830	24.312	0.002	0											457	35.016	0	0
11	24.228	0.002	0											393	34.633	0.001	0
777	24.009	0.002	0											974	34.181	0.001	0
159	23.811	0.002	0											152	34.071	0.001	0
553	23.719	0.003	0											655	34.055	0.001	0
3	23.307	0.003	0											201	33.248	0.001	0
134	23.298	0.003	0											62	33.232	0.001	0
974	23.093	0.003	0											154	33.13	0.001	0
413	23.007	0.003	0											654	32.628	0.001	0
170	22.96	0.003	0											198	32.569	0.001	0
243	22.675	0.004	0											1380	32.123	0.001	0
198	22.607	0.004	0											165	32.101	0.001	0
874	22.184	0.005	0											838	31.574	0.002	0
884	22.099	0.005	0											803	31.556	0.002	0
62	21.829	0.005	0											141	31.544	0.002	0
1	21.533	0.006	0											174	31.338	0.002	0
1301	21.415	0.006	0											105	31.309	0.002	0
881	21.413	0.006	0											864	31.206	0.002	0
452	21.407	0.006	0											1124	31.141	0.002	0
81	21.323	0.006	0											6	31.111	0.002	0
892	21.303	0.006	0											290	31.11	0.002	0
1342	21.218	0.007	0											98	30.818	0.002	0
417	21.145	0.007	0											59	30.7	0.002	0
123	21.132	0.007	0											125	30.66	0.002	0
180	21.068	0.007	0											10	30.406	0.002	0
1134	21.013	0.007	0											13	30.397	0.002	0
119	20.962	0.007	0											458	30.362	0.002	0
59	20.661	0.008	0											886	30.279	0.003	0
105	20.456	0.009	0											14	30.181	0.003	0
902	20.203	0.01	0											172	29.889	0.003	0
69	20.135	0.01	0											971	29.872	0.003	0
395	20.121	0.01	0											197	29.682	0.003	0
70	19.893	0.011	0											850	29.584	0.003	0
893	19.879	0.011	0											47	29.225	0.004	0
93	19.841	0.011	0											183	28.994	0.004	0
789	19.834	0.011	0											456	28.945	0.004	0
480	19.779	0.011	0											267	28.925	0.004	0
867	19.768	0.011	0											635	28.71	0.004	0
6	19.735	0.011	0											87	28.393	0.005	0
512	19.618	0.012	0											1417	28.388	0.005	0
168	19.567	0.012	0											415	28.385	0.005	0
1376	19.415	0.013	0											147	28.358	0.005	0
160	19.407	0.013	0											292	28.307	0.005	0
464	19.316	0.013	0											40	28.294	0.005	0
50	19.251	0.014	0											300	28.249	0.005	0
1122	19.171	0.014	0											493	28.23	0.005	0
172	19.106	0.014	0											396	28.215	0.005	0
516	19.021	0.015	0											181	28.107	0.005	0
883	18.947	0.015	0											294	28.059	0.005	0
1372	18.722	0.016	0											986	28.05	0.005	0
17	18.66	0.017	0											352	28.021	0.005	0
179	18.463	0.018	0											717	27.852	0.006	0
35	18.439	0.018	0											1301	27.815	0.006	0
718	18.314	0.019	0											368	27.581	0.006	0
190	18.313	0.019	0											876	27.55	0.006	0
802	18.283	0.019	0											102	27.479	0.007	0
144	18.215	0.02	0											452	27.352	0.007	0
324	18.155	0.02	0											203	27.258	0.007	0
162	18.141	0.02	0											81	27.163	0.007	0
482	18.096	0.021	0											153	27.08	0.008	0
189	17.998	0.021	0											416	26.925	0.008	0
1348	17.969	0.021	0											533	26.779	0.008	0
14	17.961	0.022	0											857	26.767	0.008	0
538	17.863	0.022	0											777	26.726	0.008	0
857	17.783	0.023	0											1400	26.664	0.009	0
978	17.656	0.024	0											273	26.62	0.009	0
454	17.617	0.024	0											524	26.616	0.009	0
237	17.585	0.025	0											491	26.219	0.01	0
														184	26.194	0.01	0
														1377	25.998	0.011	0
														295	25.894	0.011	0
														186	25.828	0.011	0
														884	25.817	0.011	0
														229	25.799	0.011	0
														31	25.774	0.012	0
														600	25.666	0.012	0

## Sheet: DASS-8 Discriminant validity
Implied (for all variables) Correlations (Group number 1 - Default model)									DASS-8
	DASS12	DASS8	DASS20	DASS15	DASS9	DASS16	DASS13	DASS10
DASS12									Monotrait correlations
DASS8	0.527								S	0.528
DASS20	0.466	0.492							A	0.541
DASS15	0.514	0.542	0.57						D	0.576333
DASS9	0.451	0.526	0.501	0.552
DASS16	0.428	0.452	0.418	0.461	0.405				Heterotrait correlations
DASS13	0.479	0.505	0.468	0.516	0.453	0.572			S-A	0.4985
DASS10	0.458	0.483	0.447	0.492	0.485	0.546	0.611		S-D	0.4675
									A-D	0.460556
									HTMT ratio					S	A	D
									S-A	0.932716			S
									S-D	0.847477			A	0.93
									A-D	0.824796			D	0.84	0.82

## Sheet: DASS-12 Discriminant validity
Implied (for all variables) Correlations (Group number 1 - Default model)													DASS-12
	DASS18	DASS12	DASS11	DASS1	DASS19	DASS7	DASS4	DASS2	DASS17	DASS13	DASS10	DASS3
DASS18													Monotrait correlations
DASS12	0.446												S	0.327833
DASS11	0.482	0.525											A	0.3485
DASS1	0.158	0.171	0.185										D	0.576667
DASS19	0.369	0.401	0.434	0.142
DASS7	0.31	0.338	0.365	0.119	0.373								Heterotrait correlations
DASS4	0.36	0.392	0.424	0.138	0.432	0.363							S-A	0.309687
DASS2	0.273	0.297	0.321	0.272	0.328	0.275	0.32						S-D	0.3815
DASS17	0.435	0.473	0.512	0.167	0.394	0.331	0.384	0.291					A-D	0.336563
DASS13	0.448	0.488	0.528	0.172	0.406	0.341	0.396	0.3	0.644
DASS10	0.422	0.459	0.496	0.162	0.382	0.321	0.373	0.282	0.606	0.624			HTMT ratio
DASS3	0.368	0.4	0.433	0.141	0.333	0.28	0.325	0.246	0.529	0.545	0.512		S-A	0.916211			S	A	D
													S-D	0.877416		S
													A-D	0.750761		A	0.92
																D	0.88	0.75

## Sheet: DASS-21 Discriminant validity
Implied (for all variables) Correlations (Group number 1 - Default model)																						DASS-21
	DASS18	DASS14	DASS12	DASS11	DASS8	DASS6	DASS1	DASS20	DASS19	DASS15	DASS9	DASS7	DASS4	DASS2	DASS21	DASS17	DASS16	DASS13	DASS10	DASS5	DASS3
DASS18																						Monotrait correlations
DASS14	0.378																					S	0.377286
DASS12	0.444	0.409																				A	0.392952
DASS11	0.472	0.435	0.512																			D	0.392952
DASS8	0.479	0.441	0.519	0.552
DASS6	0.437	0.403	0.474	0.504	0.511																	Heterotrait correlations
DASS1	0.149	0.137	0.162	0.172	0.174	0.159																S-A	0.359939
DASS20	0.411	0.379	0.446	0.474	0.481	0.439	0.15															S-D	0.388714
DASS19	0.367	0.338	0.397	0.423	0.429	0.391	0.133	0.43														A-D	0.380224
DASS15	0.453	0.418	0.491	0.522	0.53	0.484	0.165	0.531	0.474
DASS9	0.414	0.381	0.448	0.477	0.484	0.442	0.15	0.485	0.432	0.534												HTMT ratio
DASS7	0.328	0.302	0.355	0.378	0.383	0.35	0.119	0.384	0.342	0.423	0.386											S-A	0.93481				S	A	D
DASS4	0.342	0.315	0.371	0.394	0.4	0.365	0.124	0.401	0.481	0.442	0.403	0.319										S-D	1.00954			S
DASS2	0.27	0.249	0.293	0.312	0.316	0.289	0.265	0.317	0.283	0.349	0.319	0.253	0.264									A-D	0.96761			A	0.93
DASS21	0.411	0.379	0.445	0.474	0.481	0.439	0.15	0.431	0.384	0.475	0.433	0.343	0.358	0.283												D	1	0.97
DASS17	0.434	0.4	0.47	0.5	0.507	0.463	0.158	0.454	0.405	0.501	0.457	0.362	0.378	0.299	0.604
DASS16	0.393	0.363	0.426	0.453	0.46	0.42	0.143	0.412	0.367	0.454	0.415	0.328	0.343	0.271	0.548	0.578
DASS13	0.436	0.402	0.472	0.502	0.51	0.465	0.159	0.457	0.407	0.503	0.459	0.364	0.38	0.3	0.607	0.64	0.581
DASS10	0.421	0.388	0.457	0.486	0.493	0.45	0.153	0.441	0.393	0.486	0.444	0.352	0.367	0.29	0.587	0.619	0.561	0.622
DASS5	0.356	0.328	0.385	0.41	0.416	0.38	0.129	0.373	0.332	0.411	0.375	0.297	0.31	0.245	0.495	0.522	0.474	0.525	0.508
DASS3	0.367	0.338	0.398	0.423	0.429	0.392	0.133	0.384	0.343	0.424	0.387	0.306	0.32	0.328	0.511	0.539	0.489	0.542	0.524	0.442
													CMIN
													Model	NPAR	CMIN	DF	P	CMIN/DF
													Default model	48	687.339	183	0	3.756
													Saturated model	231	0	0
													Independence model	21	13886.7	210	0	66.127
													Baseline Comparisons
													Model	NFI	RFI	IFI	TLI	CFI
														Delta1	rho1	Delta2	rho2
													Default model	0.951	0.943	0.963	0.958	0.963
													Saturated model	1		1		1
													Independence model	0	0	0	0	0
													RMSEA
													Model	RMSEA	LO 90	HI 90	PCLOSE
													Default model	0.044	0.041	0.048	0.998
													Independence model	0.214	0.211	0.217	0

## Sheet: Distribution of items DASS-21
GET
FILE='C:\Users\Amira Ali\Desktop\Desktop 2020 1 23\Special issues MDPI\DASS-21 COVID-19 May 2021\Free DASS data\Only DASS Healthy participants.sav'.
DATASET NAME DataSet6 WINDOW=FRONT.
DESCRIPTIVES VARIABLES=DASS1 DASS2 DASS3 DASS4 DASS5 DASS6 DASS7 DASS8 DASS9 DASS10 DASS11 DASS12
DASS13 DASS14 DASS15 DASS16 DASS17 DASS18 DASS19 DASS20 DASS21 KI_DASS12 KI_Depression KI_Anxiety KI_Stress DASS8Total DASS8_Depression DASS8_Anxiety DASS8_Stress
/SAVE
/STATISTICS=MEAN STDDEV MIN MAX KURTOSIS SKEWNESS.
Descriptives
Notes
Output Created		22-NOV-2021 07:58:36
Comments
Input	Data	C:\Users\Amira Ali\Desktop\Desktop 2020 1 23\Special issues MDPI\DASS-21 COVID-19 May 2021\Free DASS data\Only DASS Healthy participants.sav
	Active Dataset	DataSet6
	File Label	Imputations
	Filter	<none>
	Weight	<none>
	Split File	<none>
	N of Rows in Working Data File	1424
Missing Value Handling	Definition of Missing	User defined missing values are treated as missing.
	Cases Used	All non-missing data are used.
Syntax		DESCRIPTIVES VARIABLES=DASS1 DASS2 DASS3 DASS4 DASS5 DASS6 DASS7 DASS8 DASS9 DASS10 DASS11 DASS12 DASS13 DASS14 DASS15 DASS16 DASS17 DASS18 DASS19 DASS20 DASS21 KI_DASS12 KI_Depression KI_Anxiety KI_Stress DASS8Total DASS8_Depression DASS8_Anxiety DASS8_Stress /SAVE /STATISTICS=MEAN STDDEV MIN MAX KURTOSIS SKEWNESS.
Resources	Processor Time	00:00:00.03
	Elapsed Time	00:00:00.02
Variables Created or Modified	ZSco01	Zscore(DASS1) I found it hard to wind down
	ZSco02	Zscore(DASS2) I was aware of dryness of my mouth
	ZSco03	Zscore(DASS3) I couldn't seem to experience any positive feeling at all
	ZSco04	Zscore(DASS4) I experienced breathing difficulty (eg excessively rapid breathing, breathlessness in the absence of physical exertion)
	ZSco05	Zscore(DASS5) I found it difficult to work up the initiative to do things
	ZSco06	Zscore(DASS6) I tended to over-react to situations
	ZSco07	Zscore(DASS7) I experienced trembling (eg in the hands)
	ZSco08	Zscore(DASS8) I felt that I was using a lot of nervous energy
	ZSco09	Zscore(DASS9) I was worried about situations in which I might panic and make a fool of myself
	ZSco10	Zscore(DASS10) I felt that I had nothing to look forward to
	ZSco11	Zscore(DASS11) I found myself getting agitated
	ZSco12	Zscore(DASS12) I found it difficult to relax
	ZSco13	Zscore(DASS13) I felt down-hearted and blue
	ZSco14	Zscore(DASS14) I was intolerant of anything that kept me from getting on with what I was doing
	ZSco15	Zscore(DASS15) I felt I was close to panic
	ZSco16	Zscore(DASS16) I was unable to become enthusiastic about anything
	ZSco17	Zscore(DASS17) I felt I wasn't worth much as a person
	ZSco18	Zscore(DASS18) I felt that I was rather touchy
	ZSco19	Zscore(DASS19) I was aware of the action of my heart in the absence of physical exertion (eg sense of heart rate increase, heart missing a beat)
	ZSco20	Zscore(DASS20) I felt scared without any good reason
	ZSco21	Zscore(DASS21) I felt that life was meaningless
	ZSco22	Zscore(KI_DASS12)
	ZSco23	Zscore(KI_Depression)
	ZSco24	Zscore(KI_Anxiety)
	ZSco25	Zscore(KI_Stress)
	ZSco26	Zscore(DASS8Total)
	ZSco27	Zscore(DASS8_Depression)
	ZSco28	Zscore(DASS8_Anxiety)
	ZSco29	Zscore(DASS8_Stress)
[DataSet6] C:\Users\Amira Ali\Desktop\Desktop 2020 1 23\Special issues MDPI\DASS-21 COVID-19 May 2021\Free DASS data\Only DASS Healthy participants.sav
Descriptive Statistics
	N	Minimum	Maximum	Mean	Std. Deviation	Skewness		Kurtosis
	Statistic	Statistic	Statistic	Statistic	Statistic	Statistic	Std. Error	Statistic	Std. Error
I found it hard to wind down	1424	0	3	0.918539	0.961139	0.738709	0.0648431	-0.502904	0.129596
I was aware of dryness of my mouth	1424	0	3	0.722612	0.925713	1.08241	0.0648431	0.118272	0.129596
I couldn't seem to experience any positive feeling at all	1424	0	3	0.754916	0.938542	1.02622	0.0648431	-0.0158511	0.129596
I experienced breathing difficulty (eg excessively rapid breathing, breathlessness in the absence of physical exertion)	1424	0	3	0.491573	0.777358	1.5112	0.0648431	1.47465	0.129596
I found it difficult to work up the initiative to do things	1424	0	3	1.18961	0.998525	0.381168	0.0648431	-0.929815	0.129596
I tended to over-react to situations	1424	0	3	0.956461	0.93848	0.638392	0.0648431	-0.578805	0.129596
I experienced trembling (eg in the hands)	1424	0	3	0.570225	0.825191	1.36057	0.0648431	1.02559	0.129596
I felt that I was using a lot of nervous energy	1424	0	3	0.874298	0.934428	0.738647	0.0648431	-0.502057	0.129596
I was worried about situations in which I might panic and make a fool of myself	1424	0	3	1.05478	1.04492	0.541835	0.0648431	-0.964369	0.129596
I felt that I had nothing to look forward to	1424	0	3	0.913624	0.994142	0.75374	0.0648431	-0.594975	0.129596
I found myself getting agitated	1424	0	3	1.01053	0.920922	0.600859	0.0648431	-0.496458	0.129596
I found it difficult to relax	1424	0	3	0.982444	0.972048	0.669524	0.0648431	-0.587652	0.129596
I felt down-hearted and blue	1424	0	3	1.02809	0.986514	0.590249	0.0648431	-0.731575	0.129596
I was intolerant of anything that kept me from getting on with what I was doing	1424	0	3	0.866573	0.883458	0.753142	0.0648431	-0.259889	0.129596
I felt I was close to panic	1424	0	3	0.761236	0.897729	0.989061	0.0648431	0.0731811	0.129596
I was unable to become enthusiastic about anything	1424	0	3	0.923455	0.94123	0.684554	0.0648431	-0.548914	0.129596
I felt I wasn't worth much as a person	1424	0	3	1.04143	1.08738	0.574578	0.0648431	-1.0409	0.129596
I felt that I was rather touchy	1424	0	3	0.833567	0.879035	0.771424	0.0648431	-0.28447	0.129596
I was aware of the action of my heart in the absence of physical exertion (eg sense of heart rate increase, heart missing a beat)	1424	0	3	0.710674	0.862589	1.02135	0.0648431	0.173117	0.129596
I felt scared without any good reason	1424	0	3	0.775983	0.930297	0.941069	0.0648431	-0.182242	0.129596
I felt that life was meaningless	1424	0	3	0.966994	1.05287	0.695347	0.0648431	-0.818926	0.129596
KI_DASS12	1424	0	36	9.97823	7.24	0.687286	0.0648431	0.0389601	0.129596
KI_Depression	1424	0	12	3.73806	3.31475	0.746122	0.0648431	-0.342196	0.129596
KI_Anxiety	1424	0	12	2.49508	2.41103	1.08728	0.0648431	1.03501	0.129596
KI_Stress	1424	0	12	3.74508	2.62059	0.509354	0.0648431	-0.368079	0.129596
DASS8Total	1424	0	24	7.3139	5.74454	0.664396	0.0648431	-0.20718	0.129596
DASS8_Depression	1424	0	9	2.86517	2.47803	0.704994	0.0648431	-0.335789	0.129596
DASS8_Anxiety	1424	0	9	2.59199	2.39406	0.753331	0.0648431	-0.300049	0.129596
DASS8_Stress	1424	0	6	1.85674	1.66624	0.656879	0.0648431	-0.412156	0.129596
Valid N (listwise)	1424
EXAMINE VARIABLES=DASS1 DASS2 DASS3 DASS4 DASS5 DASS6 DASS7 DASS8 DASS9 DASS10 DASS11 DASS12 DASS13
DASS14 DASS15 DASS16 DASS17 DASS18 DASS19 DASS20 DASS21 DASS21 KI_DASS12 KI_Depression KI_Anxiety KI_Stress DASS8Total DASS8_Depression DASS8_Anxiety DASS8_Stress
/PLOT BOXPLOT NPPLOT
/COMPARE GROUPS
/STATISTICS DESCRIPTIVES EXTREME
/CINTERVAL 95
/MISSING LISTWISE
/NOTOTAL.
Explore
Notes
Output Created		22-NOV-2021 07:58:37
Comments
Input	Data	C:\Users\Amira Ali\Desktop\Desktop 2020 1 23\Special issues MDPI\DASS-21 COVID-19 May 2021\Free DASS data\Only DASS Healthy participants.sav
	Active Dataset	DataSet6
	File Label	Imputations
	Filter	<none>
	Weight	<none>
	Split File	<none>
	N of Rows in Working Data File	1424
Missing Value Handling	Definition of Missing	User-defined missing values for dependent variables are treated as missing.
	Cases Used	Statistics are based on cases with no missing values for any dependent variable or factor used.
Syntax		EXAMINE VARIABLES=DASS1 DASS2 DASS3 DASS4 DASS5 DASS6 DASS7 DASS8 DASS9 DASS10 DASS11 DASS12 DASS13 DASS14 DASS15 DASS16 DASS17 DASS18 DASS19 DASS20 DASS21 DASS21 KI_DASS12 KI_Depression KI_Anxiety KI_Stress DASS8Total DASS8_Depression DASS8_Anxiety DASS8_Stress /PLOT BOXPLOT NPPLOT /COMPARE GROUPS /STATISTICS DESCRIPTIVES EXTREME /CINTERVAL 95 /MISSING LISTWISE /NOTOTAL.
Resources	Processor Time	00:00:17.61
	Elapsed Time	00:00:17.67
Case Processing Summary
	Cases
	Valid		Missing		Total
	N	Percent	N	Percent	N	Percent
I found it hard to wind down	1424	1	0	0	1424	1
I was aware of dryness of my mouth	1424	1	0	0	1424	1
I couldn't seem to experience any positive feeling at all	1424	1	0	0	1424	1
I experienced breathing difficulty (eg excessively rapid breathing, breathlessness in the absence of physical exertion)	1424	1	0	0	1424	1
I found it difficult to work up the initiative to do things	1424	1	0	0	1424	1
I tended to over-react to situations	1424	1	0	0	1424	1
I experienced trembling (eg in the hands)	1424	1	0	0	1424	1
I felt that I was using a lot of nervous energy	1424	1	0	0	1424	1
I was worried about situations in which I might panic and make a fool of myself	1424	1	0	0	1424	1
I felt that I had nothing to look forward to	1424	1	0	0	1424	1
I found myself getting agitated	1424	1	0	0	1424	1
I found it difficult to relax	1424	1	0	0	1424	1
I felt down-hearted and blue	1424	1	0	0	1424	1
I was intolerant of anything that kept me from getting on with what I was doing	1424	1	0	0	1424	1
I felt I was close to panic	1424	1	0	0	1424	1
I was unable to become enthusiastic about anything	1424	1	0	0	1424	1
I felt I wasn't worth much as a person	1424	1	0	0	1424	1
I felt that I was rather touchy	1424	1	0	0	1424	1
I was aware of the action of my heart in the absence of physical exertion (eg sense of heart rate increase, heart missing a beat)	1424	1	0	0	1424	1
I felt scared without any good reason	1424	1	0	0	1424	1
I felt that life was meaningless	1424	1	0	0	1424	1
KI_DASS12	1424	1	0	0	1424	1
KI_Depression	1424	1	0	0	1424	1
KI_Anxiety	1424	1	0	0	1424	1
KI_Stress	1424	1	0	0	1424	1
DASS8Total	1424	1	0	0	1424	1
DASS8_Depression	1424	1	0	0	1424	1
DASS8_Anxiety	1424	1	0	0	1424	1
DASS8_Stress	1424	1	0	0	1424	1
Descriptives
			Statistic	Std. Error
I found it hard to wind down	Mean		0.918539	0.0254701
	95% Confidence Interval for Mean	Lower Bound	0.868576
		Upper Bound	0.968502
	5% Trimmed Mean		0.853933
	Median		1
	Variance		0.923788
	Std. Deviation		0.961139
	Minimum		0
	Maximum		3
	Range		3
	Interquartile Range		2
	Skewness		0.738709	0.0648431
	Kurtosis		-0.502904	0.129596
I was aware of dryness of my mouth	Mean		0.722612	0.0245313
	95% Confidence Interval for Mean	Lower Bound	0.674491
		Upper Bound	0.770734
	5% Trimmed Mean		0.636236
	Median		0
	Variance		0.856944
	Std. Deviation		0.925713
	Minimum		0
	Maximum		3
	Range		3
	Interquartile Range		1
	Skewness		1.08241	0.0648431
	Kurtosis		0.118272	0.129596
I couldn't seem to experience any positive feeling at all	Mean		0.754916	0.0248713
	95% Confidence Interval for Mean	Lower Bound	0.706127
		Upper Bound	0.803704
	5% Trimmed Mean		0.672129
	Median		0
	Variance		0.880861
	Std. Deviation		0.938542
	Minimum		0
	Maximum		3
	Range		3
	Interquartile Range		1
	Skewness		1.02622	0.0648431
	Kurtosis		-0.0158511	0.129596
I experienced breathing difficulty (eg excessively rapid breathing, breathlessness in the absence of physical exertion)	Mean		0.491573	0.0206
	95% Confidence Interval for Mean	Lower Bound	0.451163
		Upper Bound	0.531983
	5% Trimmed Mean		0.40465
	Median		0
	Variance		0.604286
	Std. Deviation		0.777358
	Minimum		0
	Maximum		3
	Range		3
	Interquartile Range		1
	Skewness		1.5112	0.0648431
	Kurtosis		1.47465	0.129596
I found it difficult to work up the initiative to do things	Mean		1.18961	0.0264609
	95% Confidence Interval for Mean	Lower Bound	1.1377
		Upper Bound	1.24151
	5% Trimmed Mean		1.15512
	Median		1
	Variance		0.997053
	Std. Deviation		0.998525
	Minimum		0
	Maximum		3
	Range		3
	Interquartile Range		2
	Skewness		0.381168	0.0648431
	Kurtosis		-0.929815	0.129596
I tended to over-react to situations	Mean		0.956461	0.0248697
	95% Confidence Interval for Mean	Lower Bound	0.907676
		Upper Bound	1.00525
	5% Trimmed Mean		0.896067
	Median		1
	Variance		0.880745
	Std. Deviation		0.93848
	Minimum		0
	Maximum		3
	Range		3
	Interquartile Range		2
	Skewness		0.638392	0.0648431
	Kurtosis		-0.578805	0.129596
I experienced trembling (eg in the hands)	Mean		0.570225	0.0218675
	95% Confidence Interval for Mean	Lower Bound	0.527329
		Upper Bound	0.613121
	5% Trimmed Mean		0.478777
	Median		0
	Variance		0.68094
	Std. Deviation		0.825191
	Minimum		0
	Maximum		3
	Range		3
	Interquartile Range		1
	Skewness		1.36057	0.0648431
	Kurtosis		1.02559	0.129596
I felt that I was using a lot of nervous energy	Mean		0.874298	0.0247623
	95% Confidence Interval for Mean	Lower Bound	0.825723
		Upper Bound	0.922872
	5% Trimmed Mean		0.804775
	Median		1
	Variance		0.873155
	Std. Deviation		0.934428
	Minimum		0
	Maximum		3
	Range		3
	Interquartile Range		1
	Skewness		0.738647	0.0648431
	Kurtosis		-0.502057	0.129596
I was worried about situations in which I might panic and make a fool of myself	Mean		1.05478	0.0276904
	95% Confidence Interval for Mean	Lower Bound	1.00046
		Upper Bound	1.10909
	5% Trimmed Mean		1.00531
	Median		1
	Variance		1.09187
	Std. Deviation		1.04492
	Minimum		0
	Maximum		3
	Range		3
	Interquartile Range		2
	Skewness		0.541835	0.0648431
	Kurtosis		-0.964369	0.129596
I felt that I had nothing to look forward to	Mean		0.913624	0.0263447
	95% Confidence Interval for Mean	Lower Bound	0.861945
		Upper Bound	0.965302
	5% Trimmed Mean		0.848471
	Median		1
	Variance		0.988317
	Std. Deviation		0.994142
	Minimum		0
	Maximum		3
	Range		3
	Interquartile Range		2
	Skewness		0.75374	0.0648431
	Kurtosis		-0.594975	0.129596
I found myself getting agitated	Mean		1.01053	0.0244044
	95% Confidence Interval for Mean	Lower Bound	0.962661
		Upper Bound	1.05841
	5% Trimmed Mean		0.956149
	Median		1
	Variance		0.848097
	Std. Deviation		0.920922
	Minimum		0
	Maximum		3
	Range		3
	Interquartile Range		2
	Skewness		0.600859	0.0648431
	Kurtosis		-0.496458	0.129596
I found it difficult to relax	Mean		0.982444	0.0257592
	95% Confidence Interval for Mean	Lower Bound	0.931914
		Upper Bound	1.03297
	5% Trimmed Mean		0.924938
	Median		1
	Variance		0.944878
	Std. Deviation		0.972048
	Minimum		0
	Maximum		3
	Range		3
	Interquartile Range		2
	Skewness		0.669524	0.0648431
	Kurtosis		-0.587652	0.129596
I felt down-hearted and blue	Mean		1.02809	0.0261426
	95% Confidence Interval for Mean	Lower Bound	0.976808
		Upper Bound	1.07937
	5% Trimmed Mean		0.975655
	Median		1
	Variance		0.973209
	Std. Deviation		0.986514
	Minimum		0
	Maximum		3
	Range		3
	Interquartile Range		2
	Skewness		0.590249	0.0648431
	Kurtosis		-0.731575	0.129596
I was intolerant of anything that kept me from getting on with what I was doing	Mean		0.866573	0.0234116
	95% Confidence Interval for Mean	Lower Bound	0.820648
		Upper Bound	0.912498
	5% Trimmed Mean		0.796192
	Median		1
	Variance		0.780498
	Std. Deviation		0.883458
	Minimum		0
	Maximum		3
	Range		3
	Interquartile Range		1
	Skewness		0.753142	0.0648431
	Kurtosis		-0.259889	0.129596
I felt I was close to panic	Mean		0.761236	0.0237898
	95% Confidence Interval for Mean	Lower Bound	0.714569
		Upper Bound	0.807903
	5% Trimmed Mean		0.679151
	Median		1
	Variance		0.805917
	Std. Deviation		0.897729
	Minimum		0
	Maximum		3
	Range		3
	Interquartile Range		1
	Skewness		0.989061	0.0648431
	Kurtosis		0.0731811	0.129596
I was unable to become enthusiastic about anything	Mean		0.923455	0.0249426
	95% Confidence Interval for Mean	Lower Bound	0.874527
		Upper Bound	0.972383
	5% Trimmed Mean		0.859395
	Median		1
	Variance		0.885915
	Std. Deviation		0.94123
	Minimum		0
	Maximum		3
	Range		3
	Interquartile Range		2
	Skewness		0.684554	0.0648431
	Kurtosis		-0.548914	0.129596
I felt I wasn't worth much as a person	Mean		1.04143	0.0288156
	95% Confidence Interval for Mean	Lower Bound	0.984907
		Upper Bound	1.09796
	5% Trimmed Mean		0.990481
	Median		1
	Variance		1.1824
	Std. Deviation		1.08738
	Minimum		0
	Maximum		3
	Range		3
	Interquartile Range		2
	Skewness		0.574578	0.0648431
	Kurtosis		-1.0409	0.129596
I felt that I was rather touchy	Mean		0.833567	0.0232944
	95% Confidence Interval for Mean	Lower Bound	0.787872
		Upper Bound	0.879262
	5% Trimmed Mean		0.759675
	Median		1
	Variance		0.772702
	Std. Deviation		0.879035
	Minimum		0
	Maximum		3
	Range		3
	Interquartile Range		1
	Skewness		0.771424	0.0648431
	Kurtosis		-0.28447	0.129596
I was aware of the action of my heart in the absence of physical exertion (eg sense of heart rate increase, heart missing a beat)	Mean		0.710674	0.0228586
	95% Confidence Interval for Mean	Lower Bound	0.665834
		Upper Bound	0.755514
	5% Trimmed Mean		0.627809
	Median		0
	Variance		0.74406
	Std. Deviation		0.862589
	Minimum		0
	Maximum		3
	Range		3
	Interquartile Range		1
	Skewness		1.02135	0.0648431
	Kurtosis		0.173117	0.129596
I felt scared without any good reason	Mean		0.775983	0.0246528
	95% Confidence Interval for Mean	Lower Bound	0.727623
		Upper Bound	0.824343
	5% Trimmed Mean		0.695537
	Median		0
	Variance		0.865452
	Std. Deviation		0.930297
	Minimum		0
	Maximum		3
	Range		3
	Interquartile Range		1
	Skewness		0.941069	0.0648431
	Kurtosis		-0.182242	0.129596
I felt that life was meaningless	Mean		0.966994	0.027901
	95% Confidence Interval for Mean	Lower Bound	0.912263
		Upper Bound	1.02173
	5% Trimmed Mean		0.907772
	Median		1
	Variance		1.10854
	Std. Deviation		1.05287
	Minimum		0
	Maximum		3
	Range		3
	Interquartile Range		2
	Skewness		0.695347	0.0648431
	Kurtosis		-0.818926	0.129596
KI_DASS12	Mean		9.97823	0.19186
	95% Confidence Interval for Mean	Lower Bound	9.60187
		Upper Bound	10.3546
	5% Trimmed Mean		9.57584
	Median		9
	Variance		52.4177
	Std. Deviation		7.24
	Minimum		0
	Maximum		36
	Range		36
	Interquartile Range		11
	Skewness		0.687286	0.0648431
	Kurtosis		0.0389601	0.129596
KI_Depression	Mean		3.73806	0.0878407
	95% Confidence Interval for Mean	Lower Bound	3.56575
		Upper Bound	3.91037
	5% Trimmed Mean		3.5142
	Median		3
	Variance		10.9876
	Std. Deviation		3.31475
	Minimum		0
	Maximum		12
	Range		12
	Interquartile Range		5
	Skewness		0.746122	0.0648431
	Kurtosis		-0.342196	0.129596
KI_Anxiety	Mean		2.49508	0.0638921
	95% Confidence Interval for Mean	Lower Bound	2.36975
		Upper Bound	2.62042
	5% Trimmed Mean		2.29213
	Median		2
	Variance		5.81305
	Std. Deviation		2.41103
	Minimum		0
	Maximum		12
	Range		12
	Interquartile Range		4
	Skewness		1.08728	0.0648431
	Kurtosis		1.03501	0.129596
KI_Stress	Mean		3.74508	0.0694456
	95% Confidence Interval for Mean	Lower Bound	3.60886
		Upper Bound	3.88131
	5% Trimmed Mean		3.62453
	Median		3
	Variance		6.86751
	Std. Deviation		2.62059
	Minimum		0
	Maximum		12
	Range		12
	Interquartile Range		3
	Skewness		0.509354	0.0648431
	Kurtosis		-0.368079	0.129596
DASS8Total	Mean		7.3139	0.15223
	95% Confidence Interval for Mean	Lower Bound	7.01528
		Upper Bound	7.61252
	5% Trimmed Mean		6.96504
	Median		7
	Variance		32.9998
	Std. Deviation		5.74454
	Minimum		0
	Maximum		24
	Range		24
	Interquartile Range		9
	Skewness		0.664396	0.0648431
	Kurtosis		-0.20718	0.129596
DASS8_Depression	Mean		2.86517	0.0656676
	95% Confidence Interval for Mean	Lower Bound	2.73635
		Upper Bound	2.99398
	5% Trimmed Mean		2.70474
	Median		2
	Variance		6.14063
	Std. Deviation		2.47803
	Minimum		0
	Maximum		9
	Range		9
	Interquartile Range		3
	Skewness		0.704994	0.0648431
	Kurtosis		-0.335789	0.129596
DASS8_Anxiety	Mean		2.59199	0.0634424
	95% Confidence Interval for Mean	Lower Bound	2.46754
		Upper Bound	2.71645
	5% Trimmed Mean		2.42634
	Median		2
	Variance		5.73152
	Std. Deviation		2.39406
	Minimum		0
	Maximum		9
	Range		9
	Interquartile Range		4
	Skewness		0.753331	0.0648431
	Kurtosis		-0.300049	0.129596
DASS8_Stress	Mean		1.85674	0.0441554
	95% Confidence Interval for Mean	Lower Bound	1.77012
		Upper Bound	1.94336
	5% Trimmed Mean		1.75094
	Median		2
	Variance		2.77637
	Std. Deviation		1.66624
	Minimum		0
	Maximum		6
	Range		6
	Interquartile Range		3
	Skewness		0.656879	0.0648431
	Kurtosis		-0.412156	0.129596
Extreme Values
			Case Number	Value
I found it hard to wind down	Highest	1	2	3
		2	9	3
		3	10	3
		4	11	3
		5	17	3a
	Lowest	1	1418	0
		2	1415	0
		3	1414	0
		4	1413	0
		5	1412	0b
I was aware of dryness of my mouth	Highest	1	10	3
		2	23	3
		3	24	3
		4	26	3
		5	27	3a
	Lowest	1	1419	0
		2	1418	0
		3	1414	0
		4	1413	0
		5	1412	0b
I couldn't seem to experience any positive feeling at all	Highest	1	9	3
		2	10	3
		3	25	3
		4	26	3
		5	27	3a
	Lowest	1	1417	0
		2	1416	0
		3	1415	0
		4	1414	0
		5	1413	0b
I experienced breathing difficulty (eg excessively rapid breathing, breathlessness in the absence of physical exertion)	Highest	1	35	3
		2	36	3
		3	37	3
		4	38	3
		5	39	3a
	Lowest	1	1381	0
		2	1380	0
		3	1379	0
		4	1378	0
		5	1377	0b
I found it difficult to work up the initiative to do things	Highest	1	4	3
		2	7	3
		3	8	3
		4	9	3
		5	11	3a
	Lowest	1	1422	0
		2	1415	0
		3	1409	0
		4	1405	0
		5	1404	0b
I tended to over-react to situations	Highest	1	3	3
		2	5	3
		3	7	3
		4	11	3
		5	12	3a
	Lowest	1	1424	0
		2	1423	0
		3	1418	0
		4	1413	0
		5	1412	0b
I experienced trembling (eg in the hands)	Highest	1	2	3
		2	6	3
		3	8	3
		4	14	3
		5	17	3a
	Lowest	1	1424	0
		2	1423	0
		3	1422	0
		4	1421	0
		5	1420	0b
I felt that I was using a lot of nervous energy	Highest	1	1	3
		2	2	3
		3	3	3
		4	4	3
		5	5	3a
	Lowest	1	1424	0
		2	1423	0
		3	1422	0
		4	1421	0
		5	1420	0b
I was worried about situations in which I might panic and make a fool of myself	Highest	1	1	3
		2	2	3
		3	3	3
		4	4	3
		5	5	3a
	Lowest	1	1424	0
		2	1423	0
		3	1422	0
		4	1421	0
		5	1420	0b
I felt that I had nothing to look forward to	Highest	1	4	3
		2	5	3
		3	8	3
		4	9	3
		5	12	3a
	Lowest	1	1419	0
		2	1418	0
		3	1415	0
		4	1413	0
		5	1412	0b
I found myself getting agitated	Highest	1	2	3
		2	3	3
		3	8	3
		4	9	3
		5	12	3a
	Lowest	1	1423	0
		2	1422	0
		3	1421	0
		4	1420	0
		5	1418	0b
I found it difficult to relax	Highest	1	4	3
		2	5	3
		3	8	3
		4	9	3
		5	10	3a
	Lowest	1	1423	0
		2	1422	0
		3	1421	0
		4	1420	0
		5	1419	0b
I felt down-hearted and blue	Highest	1	4	3
		2	7	3
		3	8	3
		4	9	3
		5	12	3a
	Lowest	1	1424	0
		2	1423	0
		3	1421	0
		4	1420	0
		5	1417	0b
I was intolerant of anything that kept me from getting on with what I was doing	Highest	1	3	3
		2	9	3
		3	23	3
		4	26	3
		5	30	3a
	Lowest	1	1424	0
		2	1421	0
		3	1420	0
		4	1418	0
		5	1416	0b
I felt I was close to panic	Highest	1	3	3
		2	6	3
		3	8	3
		4	9	3
		5	13	3a
	Lowest	1	1423	0
		2	1421	0
		3	1420	0
		4	1419	0
		5	1411	0b
I was unable to become enthusiastic about anything	Highest	1	8	3
		2	9	3
		3	25	3
		4	26	3
		5	29	3a
	Lowest	1	1421	0
		2	1420	0
		3	1416	0
		4	1415	0
		5	1414	0b
I felt I wasn't worth much as a person	Highest	1	3	3
		2	4	3
		3	5	3
		4	6	3
		5	7	3a
	Lowest	1	1423	0
		2	1421	0
		3	1420	0
		4	1419	0
		5	1412	0b
I felt that I was rather touchy	Highest	1	7	3
		2	16	3
		3	23	3
		4	25	3
		5	26	3a
	Lowest	1	1423	0
		2	1421	0
		3	1420	0
		4	1419	0
		5	1418	0b
I was aware of the action of my heart in the absence of physical exertion (eg sense of heart rate increase, heart missing a beat)	Highest	1	6	3
		2	11	3
		3	13	3
		4	28	3
		5	33	3a
	Lowest	1	1424	0
		2	1423	0
		3	1421	0
		4	1420	0
		5	1419	0b
I felt scared without any good reason	Highest	1	6	3
		2	7	3
		3	8	3
		4	9	3
		5	18	3a
	Lowest	1	1423	0
		2	1421	0
		3	1420	0
		4	1419	0
		5	1417	0b
I felt that life was meaningless	Highest	1	5	3
		2	6	3
		3	7	3
		4	8	3
		5	9	3a
	Lowest	1	1424	0
		2	1421	0
		3	1420	0
		4	1418	0
		5	1417	0b
KI_DASS12	Highest	1	46	36
		2	38	35
		3	41	34
		4	45	34
		5	106	34
	Lowest	1	1162	0
		2	1156	0
		3	1141	0
		4	1139	0
		5	1138	.00b
KI_Depression	Highest	1	9	12
		2	25	12
		3	26	12
		4	27	12
		5	31	12.00c
	Lowest	1	1412	0
		2	1399	0
		3	1397	0
		4	1394	0
		5	1391	.00b
KI_Anxiety	Highest	1	38	12
		2	43	12
		3	45	12
		4	46	12
		5	204	12.00c
	Lowest	1	1379	0
		2	1378	0
		3	1375	0
		4	1369	0
		5	1368	.00b
KI_Stress	Highest	1	38	12
		2	46	12
		3	9	11
		4	30	11
		5	41	11.00d
	Lowest	1	1375	0
		2	1370	0
		3	1346	0
		4	1322	0
		5	1317	.00b
DASS8Total	Highest	1	8	24
		2	9	24
		3	26	24
		4	38	24
		5	41	24.00e
	Lowest	1	1399	0
		2	1388	0
		3	1386	0
		4	1375	0
		5	1371	.00b
DASS8_Depression	Highest	1	8	9
		2	9	9
		3	25	9
		4	26	9
		5	31	9.00f
	Lowest	1	1415	0
		2	1412	0
		3	1399	0
		4	1397	0
		5	1394	.00b
DASS8_Anxiety	Highest	1	6	9
		2	8	9
		3	9	9
		4	18	9
		5	19	9.00f
	Lowest	1	1423	0
		2	1421	0
		3	1420	0
		4	1419	0
		5	1407	.00b
DASS8_Stress	Highest	1	4	6
		2	5	6
		3	8	6
		4	9	6
		5	10	6.00g
	Lowest	1	1423	0
		2	1422	0
		3	1421	0
		4	1420	0
		5	1419	.00b
a. Only a partial list of cases with the value 3 are shown in the table of upper extremes.
b. Only a partial list of cases with the value 0 are shown in the table of lower extremes.
c. Only a partial list of cases with the value 12.00 are shown in the table of upper extremes.
d. Only a partial list of cases with the value 11.00 are shown in the table of upper extremes.
e. Only a partial list of cases with the value 24.00 are shown in the table of upper extremes.
f. Only a partial list of cases with the value 9.00 are shown in the table of upper extremes.
g. Only a partial list of cases with the value 6.00 are shown in the table of upper extremes.
Tests of Normality
	Kolmogorov-Smirnova			Shapiro-Wilk
	Statistic	df	Sig.	Statistic	df	Sig.
I found it hard to wind down	0.251029	1424	6.48476e-255	0.814537	1424	1.23087e-37
I was aware of dryness of my mouth	0.321105	1424	0	0.750542	1424	6.56366e-42
I couldn't seem to experience any positive feeling at all	0.31047	1424	0	0.761263	1424	2.9206e-41
I experienced breathing difficulty (eg excessively rapid breathing, breathlessness in the absence of physical exertion)	0.394431	1424	0	0.66326	1424	1.77273e-46
I found it difficult to work up the initiative to do things	0.218559	1424	4.83362e-192	0.860211	1424	8.76263e-34
I tended to over-react to situations	0.232874	1424	1.15755e-218	0.829954	1424	1.97644e-36
I experienced trembling (eg in the hands)	0.36337	1424	0	0.701051	1424	1.2321e-44
I felt that I was using a lot of nervous energy	0.266285	1424	1.55874e-287	0.808967	1424	4.72479e-38
I was worried about situations in which I might panic and make a fool of myself	0.239682	1424	6.24014e-232	0.827923	1424	1.35578e-36
I felt that I had nothing to look forward to	0.266881	1424	7.54266e-289	0.804504	1424	2.22972e-38
I found myself getting agitated	0.237007	1424	1.13878e-226	0.84113	1424	1.68303e-35
I found it difficult to relax	0.228048	1424	1.70936e-209	0.827437	1424	1.23939e-36
I felt down-hearted and blue	0.22071	1424	6.25412e-196	0.83576	1424	5.92646e-36
I was intolerant of anything that kept me from getting on with what I was doing	0.246086	1424	9.07019e-245	0.815711	1424	1.51032e-37
I felt I was close to panic	0.291938	1424	0	0.776432	1424	2.65789e-40
I was unable to become enthusiastic about anything	0.246844	1424	2.59724e-246	0.821336	1424	4.08896e-37
I felt I wasn't worth much as a person	0.261381	1424	7.78559e-277	0.81063	1424	6.27392e-38
I felt that I was rather touchy	0.261792	1424	1.00721e-277	0.808191	1424	4.14205e-38
I was aware of the action of my heart in the absence of physical exertion (eg sense of heart rate increase, heart missing a beat)	0.307638	1424	0	0.7663	1424	6.00201e-41
I felt scared without any good reason	0.30281	1424	0	0.774207	1424	1.90826e-40
I felt that life was meaningless	0.269541	1424	9.47665e-295	0.80181	1424	1.42656e-38
KI_DASS12	0.0840696	1424	1.5773e-26	0.951738	1424	3.07401e-21
KI_Depression	0.133746	1424	7.42538e-70	0.905999	1424	9.61736e-29
KI_Anxiety	0.167096	1424	1.20102e-110	0.88016	1424	8.89596e-32
KI_Stress	0.117535	1424	2.00828e-53	0.951774	1424	3.12904e-21
DASS8Total	0.101475	1424	2.4616e-39	0.939493	1424	1.19521e-23
DASS8_Depression	0.138613	1424	3.18891e-75	0.909253	1424	2.569e-28
DASS8_Anxiety	0.1634	1424	1.1572e-105	0.895574	1424	4.88415e-30
DASS8_Stress	0.164834	1424	1.39093e-107	0.8929	1424	2.36137e-30
a. Lilliefors Significance Correction
I found it hard to wind down
I was aware of dryness of my mouth
I couldn't seem to experience any positive feeling at all
I experienced breathing difficulty (eg excessively rapid breathing, breathlessness in the absence of physical exertion)
I found it difficult to work up the initiative to do things
I tended to over-react to situations
I experienced trembling (eg in the hands)
I felt that I was using a lot of nervous energy
I was worried about situations in which I might panic and make a fool of myself
I felt that I had nothing to look forward to
I found myself getting agitated
I found it difficult to relax
I felt down-hearted and blue
I was intolerant of anything that kept me from getting on with what I was doing
I felt I was close to panic
I was unable to become enthusiastic about anything
I felt I wasn't worth much as a person
I felt that I was rather touchy
I was aware of the action of my heart in the absence of physical exertion (eg sense of heart rate increase, heart missing a beat)
I felt scared without any good reason
I felt that life was meaningless
KI_DASS12
KI_Depression
KI_Anxiety
KI_Stress
DASS8Total
DASS8_Depression
DASS8_Anxiety
DASS8_Stress

## Sheet: DASS-8 second order
													CMIN
													Model	NPAR	CMIN	DF	P	CMIN/DF
													Default model	21	44.961	15	0	2.997
													Saturated model	36	0	0
													Independence model	8	4957.51	28	0	177.054
													Baseline Comparisons
													Model	NFI	RFI	IFI	TLI	CFI
														Delta1	rho1	Delta2	rho2
													Default model	0.991	0.983	0.994	0.989	0.994
													Saturated model	1		1		1
													Independence model	0	0	0	0	0
													RMSEA
													Model	RMSEA	LO 90	HI 90	PCLOSE
													Default model	0.037	0.025	0.05	0.945
													Independence model	0.352	0.344	0.36	0

## Sheet: DASS-8 bifactor
													CMIN
													Model	NPAR	CMIN	DF	P	CMIN/DF
													Default model	20	54.707	16	0	3.419
													Saturated model	36	0	0
													Independence model	8	3829.94	28	0	136.784
													Baseline Comparisons
													Model	NFI	RFI	IFI	TLI	CFI
														Delta1	rho1	Delta2	rho2
													Default model	0.986	0.975	0.99	0.982	0.99
													Saturated model	1		1		1
													Independence model	0	0	0	0	0
													RMSEA
													Model	RMSEA	LO 90	HI 90	PCLOSE
													Default model	0.043	0.03	0.055	0.827
													Independence model	0.319	0.31	0.327	0
Regression Weights: (Group number 1 - Default model)									Standardized Regression Weights: (Group number 1 - Default model)
			Estimate	S.E.	C.R.	P	Label					Estimate
DASS9	<---	Anxiety	1						DASS9	<---	Anxiety	0.694
DASS15	<---	Anxiety	0.743	0.106	6.988	***	par_2		DASS15	<---	Anxiety	0.717
DASS20	<---	Anxiety	0.833	0.079	10.556	***	par_3		DASS20	<---	Anxiety	0.678
DASS10	<---	Depression	1						DASS10	<---	Depression	0.747
DASS13	<---	Depression	1.034	0.044	23.498	***	par_4		DASS13	<---	Depression	0.783
DASS16	<---	Depression	0.833	0.071	11.747	***	par_5		DASS16	<---	Depression	0.665
DASS8	<---	Stress	1						DASS8	<---	Stress	0.726
DASS12	<---	Stress	0.974	0.047	20.765	***	par_9		DASS12	<---	Stress	0.672
DASS10	<---	DASS8GeneralFactor	0	4606.33	0	1	a		DASS10	<---	DASS8GeneralFactor	0
DASS13	<---	DASS8GeneralFactor	0	4606.33	0	1	a		DASS13	<---	DASS8GeneralFactor	0
DASS16	<---	DASS8GeneralFactor	0	4606.33	0	1	a		DASS16	<---	DASS8GeneralFactor	0
DASS9	<---	DASS8GeneralFactor	0	4606.33	0	1	a		DASS9	<---	DASS8GeneralFactor	0
DASS15	<---	DASS8GeneralFactor	0	4606.33	0	1	a		DASS15	<---	DASS8GeneralFactor	0
DASS20	<---	DASS8GeneralFactor	0	4606.33	0	1	a		DASS20	<---	DASS8GeneralFactor	0
DASS8	<---	DASS8GeneralFactor	0	4606.33	0	1	a		DASS8	<---	DASS8GeneralFactor	0
DASS12	<---	DASS8GeneralFactor	0	4606.33	0	1	a		DASS12	<---	DASS8GeneralFactor	0

## Sheet: DASS-12 second order
													CMIN
													Model	NPAR	CMIN	DF	P	CMIN/DF
													Default model	28	140.436	50	0	2.809
													Saturated model	78	0	0
													Independence model	12	6074.26	66	0	92.034
													Baseline Comparisons
													Model	NFI	RFI	IFI	TLI	CFI
														Delta1	rho1	Delta2	rho2
													Default model	0.977	0.969	0.985	0.98	0.985
													Saturated model	1		1		1
													Independence model	0	0	0	0	0
													RMSEA
													Model	RMSEA	LO 90	HI 90	PCLOSE
													Default model	0.036	0.029	0.043	1
													Independence model	0.253	0.248	0.258	0

## Sheet: DASS-12 Bifactor
													CMIN
													Model	NPAR	CMIN	DF	P	CMIN/DF
													Default model	29	91.305	49	0	1.863
													Saturated model	78	0	0
													Independence model	12	3688.6	66	0	55.888
													Baseline Comparisons
													Model	NFI	RFI	IFI	TLI	CFI
														Delta1	rho1	Delta2	rho2
													Default model	0.975	0.967	0.988	0.984	0.988
													Saturated model	1		1		1
													Independence model	0	0	0	0	0
													RMSEA
													Model	RMSEA	LO 90	HI 90	PCLOSE
													Default model	0.029	0.02	0.038	1
													Independence model	0.231	0.224	0.237	0
Regression Weights: (Group number 1 - Default model)									Standardized Regression Weights: (Group number 1 - Default model)
			Estimate	S.E.	C.R.	P	Label					Estimate
DASS2	<---	Anxiety	1						DASS2	<---	Anxiety	0.345
DASS4	<---	Anxiety	1.489	0.203	7.32	***			DASS4	<---	Anxiety	0.618
DASS7	<---	Anxiety	1.107	0.149	7.431	***			DASS7	<---	Anxiety	0.435
DASS19	<---	Anxiety	1.521	0.212	7.169	***			DASS19	<---	Anxiety	0.583
DASS3	<---	Depression	1						DASS3	<---	Depression	0.667
DASS10	<---	Depression	1.169	0.06	19.506	***			DASS10	<---	Depression	0.738
DASS13	<---	Depression	1.131	0.057	19.811	***			DASS13	<---	Depression	0.743
DASS17	<---	Depression	1.275	0.067	18.908	***			DASS17	<---	Depression	0.74
DASS1	<---	Stress	1						DASS1	<---	Stress	0.032
DASS11	<---	Stress	-18.619	43.686	-0.426	0.67			DASS11	<---	Stress	-0.661
DASS12	<---	Stress	-18.782	44.059	-0.426	0.67			DASS12	<---	Stress	-0.616
DASS18	<---	Stress	-14.942	35.388	-0.422	0.673			DASS18	<---	Stress	-0.534
DASS3	<---	DASS12Total	0.226	0.073	3.105	0.002	a		DASS3	<---	DASS12Total	0.237
DASS10	<---	DASS12Total	0.226	0.073	3.105	0.002	a		DASS10	<---	DASS12Total	0.224
DASS13	<---	DASS12Total	0.226	0.073	3.105	0.002	a		DASS13	<---	DASS12Total	0.234
DASS17	<---	DASS12Total	0.226	0.073	3.105	0.002	a		DASS17	<---	DASS12Total	0.206
DASS2	<---	DASS12Total	0.226	0.073	3.105	0.002	a		DASS2	<---	DASS12Total	0.235
DASS4	<---	DASS12Total	0.226	0.073	3.105	0.002	a		DASS4	<---	DASS12Total	0.283
DASS7	<---	DASS12Total	0.226	0.073	3.105	0.002	a		DASS7	<---	DASS12Total	0.268
DASS19	<---	DASS12Total	0.226	0.073	3.105	0.002	a		DASS19	<---	DASS12Total	0.262
DASS1	<---	DASS12Total	0.226	0.073	3.105	0.002	a		DASS1	<---	DASS12Total	0.23
DASS11	<---	DASS12Total	0.226	0.073	3.105	0.002	a		DASS11	<---	DASS12Total	0.253
DASS12	<---	DASS12Total	0.226	0.073	3.105	0.002	a		DASS12	<---	DASS12Total	0.234
DASS18	<---	DASS12Total	0.226	0.073	3.105	0.002	a		DASS18	<---	DASS12Total	0.254
